# Supplementary material for: Genome-wide identification of hypoxia-induced enhancer regions
Source: PeerJ. 2015 Dec 21;3:e1527. doi: 10.7717/peerj.1527 (PMC4690393; doi:10.7717/peerj.1527)
Supplement: File S5 [file peerj-03-1527-s005.zip]

Archive with 93 entries (76 files):
- enhancer_analysis_pipeline/
- enhancer_analysis_pipeline/.DS_Store
- __MACOSX/
- __MACOSX/enhancer_analysis_pipeline/
- __MACOSX/enhancer_analysis_pipeline/._.DS_Store
- enhancer_analysis_pipeline/count_data_by_100_bp_bin/
- enhancer_analysis_pipeline/count_data_by_100_bp_bin/.DS_Store
- __MACOSX/enhancer_analysis_pipeline/count_data_by_100_bp_bin/
- __MACOSX/enhancer_analysis_pipeline/count_data_by_100_bp_bin/._.DS_Store
- enhancer_analysis_pipeline/count_data_by_100_bp_bin/chromosome_displayer.pl
- enhancer_analysis_pipeline/count_data_by_100_bp_bin/count_data_by_100_bp_bin_generator_shell.pl
- __MACOSX/enhancer_analysis_pipeline/count_data_by_100_bp_bin/._count_data_by_100_bp_bin_generator_shell.pl
- enhancer_analysis_pipeline/count_data_by_100_bp_bin/data_hundo_allocator_from_weighted_list_hundo_stranded_corrected.pl
- __MACOSX/enhancer_analysis_pipeline/count_data_by_100_bp_bin/._data_hundo_allocator_from_weighted_list_hundo_stranded_corrected.pl
- enhancer_analysis_pipeline/count_data_by_100_bp_bin/prepare_for_DESeq_chromosomes.pl
- enhancer_analysis_pipeline/count_data_by_100_bp_bin/READ ME count_data_by_100_bp_bin.docx
- __MACOSX/enhancer_analysis_pipeline/count_data_by_100_bp_bin/._READ ME count_data_by_100_bp_bin.docx
- enhancer_analysis_pipeline/creation_of_randomer_genomic_match_list/
- enhancer_analysis_pipeline/creation_of_randomer_genomic_match_list/.DS_Store
- __MACOSX/enhancer_analysis_pipeline/creation_of_randomer_genomic_match_list/
- __MACOSX/enhancer_analysis_pipeline/creation_of_randomer_genomic_match_list/._.DS_Store
- enhancer_analysis_pipeline/creation_of_randomer_genomic_match_list/bowtie_to_match_list/
- enhancer_analysis_pipeline/creation_of_randomer_genomic_match_list/bowtie_to_match_list/.DS_Store
- __MACOSX/enhancer_analysis_pipeline/creation_of_randomer_genomic_match_list/bowtie_to_match_list/
- __MACOSX/enhancer_analysis_pipeline/creation_of_randomer_genomic_match_list/bowtie_to_match_list/._.DS_Store
- enhancer_analysis_pipeline/creation_of_randomer_genomic_match_list/bowtie_to_match_list/bowtie_to_matchlist_shell.pl
- __MACOSX/enhancer_analysis_pipeline/creation_of_randomer_genomic_match_list/bowtie_to_match_list/._bowtie_to_matchlist_shell.pl
- enhancer_analysis_pipeline/creation_of_randomer_genomic_match_list/bowtie_to_match_list/lesser_alignments_filter.pl
- __MACOSX/enhancer_analysis_pipeline/creation_of_randomer_genomic_match_list/bowtie_to_match_list/._lesser_alignments_filter.pl
- enhancer_analysis_pipeline/creation_of_randomer_genomic_match_list/bowtie_to_match_list/non_repeats_single_printer.pl
- __MACOSX/enhancer_analysis_pipeline/creation_of_randomer_genomic_match_list/bowtie_to_match_list/._non_repeats_single_printer.pl
- enhancer_analysis_pipeline/creation_of_randomer_genomic_match_list/bowtie_to_match_list/randomer_genomic_bowtie2_alignment_repeat_non_repeat_separater.pl
- __MACOSX/enhancer_analysis_pipeline/creation_of_randomer_genomic_match_list/bowtie_to_match_list/._randomer_genomic_bowtie2_alignment_repeat_non_repeat_separater.pl
- enhancer_analysis_pipeline/creation_of_randomer_genomic_match_list/bowtie_to_match_list/randomer_genomic_weighted_list_maker_bowtie2_all.pl
- __MACOSX/enhancer_analysis_pipeline/creation_of_randomer_genomic_match_list/bowtie_to_match_list/._randomer_genomic_weighted_list_maker_bowtie2_all.pl
- enhancer_analysis_pipeline/creation_of_randomer_genomic_match_list/bowtie_to_match_list/READ ME bowtie to randomer genomic match list.docx
- __MACOSX/enhancer_analysis_pipeline/creation_of_randomer_genomic_match_list/bowtie_to_match_list/._READ ME bowtie to randomer genomic match list.docx
- enhancer_analysis_pipeline/creation_of_randomer_genomic_match_list/bowtie_to_match_list/rep_sorter.pl
- __MACOSX/enhancer_analysis_pipeline/creation_of_randomer_genomic_match_list/bowtie_to_match_list/._rep_sorter.pl
- enhancer_analysis_pipeline/creation_of_randomer_genomic_match_list/bowtie_to_match_list/repeat_loc_liner.pl
- __MACOSX/enhancer_analysis_pipeline/creation_of_randomer_genomic_match_list/bowtie_to_match_list/._repeat_loc_liner.pl
- enhancer_analysis_pipeline/creation_of_randomer_genomic_match_list/bowtie_to_match_list/repeat_region_number_limiter.pl
- __MACOSX/enhancer_analysis_pipeline/creation_of_randomer_genomic_match_list/bowtie_to_match_list/._repeat_region_number_limiter.pl
- enhancer_analysis_pipeline/creation_of_randomer_genomic_match_list/bowtie_to_match_list/repeat_region_number_limiter_bad_repeats_lister.pl
- __MACOSX/enhancer_analysis_pipeline/creation_of_randomer_genomic_match_list/bowtie_to_match_list/._repeat_region_number_limiter_bad_repeats_lister.pl
- enhancer_analysis_pipeline/creation_of_randomer_genomic_match_list/bowtie_to_match_list/repeats_singleton_separater.pl
- __MACOSX/enhancer_analysis_pipeline/creation_of_randomer_genomic_match_list/bowtie_to_match_list/._repeats_singleton_separater.pl
- enhancer_analysis_pipeline/creation_of_randomer_genomic_match_list/Illumina_to_bowtie/
- enhancer_analysis_pipeline/creation_of_randomer_genomic_match_list/Illumina_to_bowtie/.DS_Store
- __MACOSX/enhancer_analysis_pipeline/creation_of_randomer_genomic_match_list/Illumina_to_bowtie/
- __MACOSX/enhancer_analysis_pipeline/creation_of_randomer_genomic_match_list/Illumina_to_bowtie/._.DS_Store
- enhancer_analysis_pipeline/creation_of_randomer_genomic_match_list/Illumina_to_bowtie/illumina_to_bowtie_shell.pl
- __MACOSX/enhancer_analysis_pipeline/creation_of_randomer_genomic_match_list/Illumina_to_bowtie/._illumina_to_bowtie_shell.pl
- enhancer_analysis_pipeline/creation_of_randomer_genomic_match_list/Illumina_to_bowtie/match_library_pe_QF.pl
- __MACOSX/enhancer_analysis_pipeline/creation_of_randomer_genomic_match_list/Illumina_to_bowtie/._match_library_pe_QF.pl
- enhancer_analysis_pipeline/creation_of_randomer_genomic_match_list/Illumina_to_bowtie/randomer_genomic_fasta_maker_from_fastq.pl
- __MACOSX/enhancer_analysis_pipeline/creation_of_randomer_genomic_match_list/Illumina_to_bowtie/._randomer_genomic_fasta_maker_from_fastq.pl
- enhancer_analysis_pipeline/creation_of_randomer_genomic_match_list/Illumina_to_bowtie/READ ME Illumina to Bowtie.docx
- __MACOSX/enhancer_analysis_pipeline/creation_of_randomer_genomic_match_list/Illumina_to_bowtie/._READ ME Illumina to Bowtie.docx
- enhancer_analysis_pipeline/creation_of_randomer_genomic_match_list/Illumina_to_bowtie/shell_concatenate.pl
- __MACOSX/enhancer_analysis_pipeline/creation_of_randomer_genomic_match_list/Illumina_to_bowtie/._shell_concatenate.pl
- enhancer_analysis_pipeline/creation_of_randomer_genomic_match_list/READ ME creation_of_randomer_genomic_match_list.docx
- __MACOSX/enhancer_analysis_pipeline/creation_of_randomer_genomic_match_list/._READ ME creation_of_randomer_genomic_match_list.docx
- enhancer_analysis_pipeline/DESeq/
- enhancer_analysis_pipeline/DESeq/.DS_Store
- __MACOSX/enhancer_analysis_pipeline/DESeq/
- __MACOSX/enhancer_analysis_pipeline/DESeq/._.DS_Store
- enhancer_analysis_pipeline/DESeq/.Rapp.history
- enhancer_analysis_pipeline/DESeq/DESeq_negative_binomial_shell_chromosomes_filter_args.R
- enhancer_analysis_pipeline/DESeq/READ ME DESeq.docx
- __MACOSX/enhancer_analysis_pipeline/DESeq/._READ ME DESeq.docx
- enhancer_analysis_pipeline/dixon_outlier_test/
- enhancer_analysis_pipeline/dixon_outlier_test/.DS_Store
- __MACOSX/enhancer_analysis_pipeline/dixon_outlier_test/
- __MACOSX/enhancer_analysis_pipeline/dixon_outlier_test/._.DS_Store
- enhancer_analysis_pipeline/dixon_outlier_test/dixon_outlier_test.pl
- __MACOSX/enhancer_analysis_pipeline/dixon_outlier_test/._dixon_outlier_test.pl
- enhancer_analysis_pipeline/dixon_outlier_test/experimental_randomer_counter.pl
- __MACOSX/enhancer_analysis_pipeline/dixon_outlier_test/._experimental_randomer_counter.pl
- enhancer_analysis_pipeline/dixon_outlier_test/READ ME dixon outlier test.docx
- __MACOSX/enhancer_analysis_pipeline/dixon_outlier_test/._READ ME dixon outlier test.docx
- enhancer_analysis_pipeline/experimental_read_miner/
- enhancer_analysis_pipeline/experimental_read_miner/.DS_Store
- __MACOSX/enhancer_analysis_pipeline/experimental_read_miner/
- __MACOSX/enhancer_analysis_pipeline/experimental_read_miner/._.DS_Store
- enhancer_analysis_pipeline/experimental_read_miner/experimental_read_miner_se.pl
- __MACOSX/enhancer_analysis_pipeline/experimental_read_miner/._experimental_read_miner_se.pl
- enhancer_analysis_pipeline/experimental_read_miner/READ ME experimental_read_miner.docx
- __MACOSX/enhancer_analysis_pipeline/experimental_read_miner/._READ ME experimental_read_miner.docx
- enhancer_analysis_pipeline/method pictorial.pdf
- __MACOSX/enhancer_analysis_pipeline/._method pictorial.pdf
- enhancer_analysis_pipeline/READ ME Enhancer Pipeline.docx
- __MACOSX/enhancer_analysis_pipeline/._READ ME Enhancer Pipeline.docx
