# Supplementary material for: Genome-wide identification of hypoxia-induced enhancer regions
Source: PeerJ. 2015 Dec 21;3:e1527. doi: 10.7717/peerj.1527 (PMC4690393; doi:10.7717/peerj.1527)
Supplement: File S5 [file peerj-03-1527-s005.zip › enhancer_analysis_pipeline/count_data_by_100_bp_bin/chromosome_displayer.pl]

if ($#ARGV == 6 && $ARGV[0] ne $ARGV[1]) {
	$fileN1 = $ARGV[0];
	$fileN2 = $ARGV[1];
	$fileN3 = $ARGV[2];
	$fileH1 = $ARGV[3];
	$fileH2 = $ARGV[4];
	$fileH3 = $ARGV[5];
	$fileNH = $ARGV[6];
} else {
	print "Check yo files B\n";
	die;	
}

open(OUTPUT, ">$fileNH")
	or die "Can't open output: $file_out $!";


$n1 = 0;
$n2 = 0;
$n3 = 0;
$h1 = 0;
$h2 = 0;
$h3 = 0;

open(FILEN1, "<$fileN1")
	or die "Can't open input: $file $!";


while (<FILEN1>) { # read in an ID

	
	$Line = $_;
	chop $Line;
	@TABs = split(/\t/, $Line);
	$n1 ++;
	@arrayN1[$n1]=@TABs[2];
	
}	

close FILEN1;

open(FILEN2, "<$fileN2")
	or die "Can't open input: $file $!";


while (<FILEN2>) { # read in an ID

	
	$Line = $_;
	chop $Line;
	@TABs = split(/\t/, $Line);
	$n2 ++;
	@arrayN2[$n2]=@TABs[2];
	
}	

close FILEN2;

open(FILEN3, "<$fileN3")
	or die "Can't open input: $file $!";


while (<FILEN3>) { # read in an ID

	
	$Line = $_;
	chop $Line;
	@TABs = split(/\t/, $Line);
	$n3 ++;
	@arrayN3[$n3]=@TABs[2];
	
}	

close FILEN3;


open(FILEH1, "<$fileH1")
	or die "Can't open input: $file $!";


while (<FILEH1>) { # read in an ID

	$Line = $_;
	chop $Line;
	@TABs = split(/\t/, $Line);
	$h1 ++;
	@arrayH1[$h1]=@TABs[2];
	
}	

close FILEH1;


open(FILEH2, "<$fileH2")
	or die "Can't open input: $file $!";


while (<FILEH2>) { # read in an ID

	$Line = $_;
	chop $Line;
	@TABs = split(/\t/, $Line);
	$h2 ++;
	@arrayH2[$h2]=@TABs[2];
	
}	

close FILEH2;

open(FILEH3, "<$fileH3")
	or die "Can't open input: $file $!";


while (<FILEH3>) { # read in an ID

	$Line = $_;
	chop $Line;
	@TABs = split(/\t/, $Line);
	$h3 ++;
	@arrayH3[$h3]=@TABs[2];
	
}	

close FILEH3;


@values = ($n1,$n2,$n3,$h1,$h2,$h3);
use List::Util qw/max/;
my $highestvalue = max @values;


$i=1;
while ($i<=$highestvalue){
	print OUTPUT "$i\t@arrayN1[$i]\t@arrayN2[$i]\t@arrayN3[$i]\t@arrayH1[$i]\t@arrayH2[$i]\t@arrayH3[$i]\n";
	$i++;
}

close OUTPUT;
