# Supplementary material for: Genome-wide identification of hypoxia-induced enhancer regions
Source: PeerJ. 2015 Dec 21;3:e1527. doi: 10.7717/peerj.1527 (PMC4690393; doi:10.7717/peerj.1527)
Supplement: File S5 [file peerj-03-1527-s005.zip › enhancer_analysis_pipeline/count_data_by_100_bp_bin/prepare_for_DESeq_chromosomes.pl]

$file2L = $ARGV[0];
$file2R = $ARGV[1];
$file3L = $ARGV[2];
$file3R = $ARGV[3];
$fileX = $ARGV[4];
$file_all_out = $ARGV[5];

open(OUTPUT, ">$file_all_out")
	or die "Can't open input: $file $!";


open(FILE2L, "<$file2L")
	or die "Can't open input: $file $!";
	
open(FILE2R, "<$file2R")
	or die "Can't open input: $file $!";
	
open(FILE3L, "<$file3L")
	or die "Can't open input: $file $!";
	
open(FILE3R, "<$file3R")
	or die "Can't open input: $file $!";
	
open(FILEX, "<$fileX")
	or die "Can't open input: $file $!";

print OUTPUT "\tuntreated1\tuntreated2\tuntreated3\ttreated1\ttreated2\ttreated3\n";

while (<FILE2L>) { # read in an ID

	$Line= $_;
	chop $Line;
	@TABs = split(/\t/, $Line);
	$bin = @TABs[0];
	$bin = "2L_"."$bin";
	$n1=@TABs[1];
	if($n1>0){
		$n1 = int($n1);
	}else{
		$n1 = 0;
	}
	$n2=@TABs[2];
	if($n2>0){
		$n2 = int($n2);
	}else{
		$n2 = 0;
	}


	$n3=@TABs[3];
	if($n3>0){
		$n3 = int($n3);
	}else{
		$n3 = 0;
	}
	$h1=@TABs[4];
	if($h1>0){
		$h1 = int($h1);
	}else{
		$h1 = 0;
	}
	$h2=@TABs[5];
	if($h2>0){
		$h2 = int($h2);
	}else{
		$h2 = 0;
	}
	$h3=@TABs[6];
	if($h3>0){
		$h3 = int($h3);
	}else{
		$h3 = 0;
	}
	print OUTPUT "$bin\t$n1\t$n2\t$n3\t$h1\t$h2\t$h3\n";
}

close FILE2L;

while (<FILE2R>) { # read in an ID

	$Line= $_;
	chop $Line;
	@TABs = split(/\t/, $Line);
	$bin = @TABs[0];
	$bin = "2R_"."$bin";
	$n1=@TABs[1];
	if($n1>0){
		$n1 = int($n1);
	}else{
		$n1 = 0;
	}
	$n2=@TABs[2];
	if($n2>0){
		$n2 = int($n2);
	}else{
		$n2 = 0;
	}


	$n3=@TABs[3];
	if($n3>0){
		$n3 = int($n3);
	}else{
		$n3 = 0;
	}
	$h1=@TABs[4];
	if($h1>0){
		$h1 = int($h1);
	}else{
		$h1 = 0;
	}
	$h2=@TABs[5];
	if($h2>0){
		$h2 = int($h2);
	}else{
		$h2 = 0;
	}
	$h3=@TABs[6];
	if($h3>0){
		$h3 = int($h3);
	}else{
		$h3 = 0;
	}
	print OUTPUT "$bin\t$n1\t$n2\t$n3\t$h1\t$h2\t$h3\n";
}

close FILE2R;


while (<FILE3L>) { # read in an ID

	$Line= $_;
	chop $Line;
	@TABs = split(/\t/, $Line);
	$bin = @TABs[0];
	$bin = "3L_"."$bin";
	$n1=@TABs[1];
	if($n1>0){
		$n1 = int($n1);
	}else{
		$n1 = 0;
	}
	$n2=@TABs[2];
	if($n2>0){
		$n2 = int($n2);
	}else{
		$n2 = 0;
	}


	$n3=@TABs[3];
	if($n3>0){
		$n3 = int($n3);
	}else{
		$n3 = 0;
	}
	$h1=@TABs[4];
	if($h1>0){
		$h1 = int($h1);
	}else{
		$h1 = 0;
	}
	$h2=@TABs[5];
	if($h2>0){
		$h2 = int($h2);
	}else{
		$h2 = 0;
	}
	$h3=@TABs[6];
	if($h3>0){
		$h3 = int($h3);
	}else{
		$h3 = 0;
	}
	print OUTPUT "$bin\t$n1\t$n2\t$n3\t$h1\t$h2\t$h3\n";
}

close FILE3L;


while (<FILE3R>) { # read in an ID

	$Line= $_;
	chop $Line;
	@TABs = split(/\t/, $Line);
	$bin = @TABs[0];
	$bin = "3R_"."$bin";
	$n1=@TABs[1];
	if($n1>0){
		$n1 = int($n1);
	}else{
		$n1 = 0;
	}
	$n2=@TABs[2];
	if($n2>0){
		$n2 = int($n2);
	}else{
		$n2 = 0;
	}


	$n3=@TABs[3];
	if($n3>0){
		$n3 = int($n3);
	}else{
		$n3 = 0;
	}
	$h1=@TABs[4];
	if($h1>0){
		$h1 = int($h1);
	}else{
		$h1 = 0;
	}
	$h2=@TABs[5];
	if($h2>0){
		$h2 = int($h2);
	}else{
		$h2 = 0;
	}
	$h3=@TABs[6];
	if($h3>0){
		$h3 = int($h3);
	}else{
		$h3 = 0;
	}
	print OUTPUT "$bin\t$n1\t$n2\t$n3\t$h1\t$h2\t$h3\n";
}

close FILE3R;


while (<FILEX>) { # read in an ID

	$Line= $_;
	chop $Line;
	@TABs = split(/\t/, $Line);
	$bin = @TABs[0];
	$bin = "X_"."$bin";
	$n1=@TABs[1];
	if($n1>0){
		$n1 = int($n1);
	}else{
		$n1 = 0;
	}
	$n2=@TABs[2];
	if($n2>0){
		$n2 = int($n2);
	}else{
		$n2 = 0;
	}


	$n3=@TABs[3];
	if($n3>0){
		$n3 = int($n3);
	}else{
		$n3 = 0;
	}
	$h1=@TABs[4];
	if($h1>0){
		$h1 = int($h1);
	}else{
		$h1 = 0;
	}
	$h2=@TABs[5];
	if($h2>0){
		$h2 = int($h2);
	}else{
		$h2 = 0;
	}
	$h3=@TABs[6];
	if($h3>0){
		$h3 = int($h3);
	}else{
		$h3 = 0;
	}
	print OUTPUT "$bin\t$n1\t$n2\t$n3\t$h1\t$h2\t$h3\n";
}

close FILEX;
