# Supplementary material for: Genome-wide identification of hypoxia-induced enhancer regions
Source: PeerJ. 2015 Dec 21;3:e1527. doi: 10.7717/peerj.1527 (PMC4690393; doi:10.7717/peerj.1527)
Supplement: File S5 [file peerj-03-1527-s005.zip › enhancer_analysis_pipeline/creation_of_randomer_genomic_match_list/bowtie_to_match_list/lesser_alignments_filter.pl]

#this script takes in the bowtie2 aligned sequences which map to more than one location and prints only those repeats with the highest alignemnt score
if ($#ARGV == 1) {
	$fileIn = $ARGV[0];
	$file_out_top_scores = $ARGV[1];

}


open(OUTPUT, ">$file_out_top_scores");


open(FILE, "<$fileIn");


while (<FILE>) { 
	
	$Line= $_;
	chop $Line;
	@TABs_Line = split(/\t/, $Line);
	@alignment_type = split(/:/, @TABs_Line[11]);
	$alignment_score = @alignment_type[2];

	if (@TABs_Line[1] < 256){ 

		$score_to_match = $alignment_score;
		print OUTPUT "$Line\n";	
	}
		
	if (@TABs_Line[1] > 255){ 
		if ($alignment_score >= $score_to_match){ 
			print OUTPUT "$Line\n";
		}
	}
}

close FILE;
close OUTPUT;
