# Supplementary material for: Genome-wide identification of hypoxia-induced enhancer regions
Source: PeerJ. 2015 Dec 21;3:e1527. doi: 10.7717/peerj.1527 (PMC4690393; doi:10.7717/peerj.1527)
Supplement: File S5 [file peerj-03-1527-s005.zip › enhancer_analysis_pipeline/creation_of_randomer_genomic_match_list/bowtie_to_match_list/non_repeats_single_printer.pl]

#this script reads in the non_repeat bowtie alignments and prints only the randomer and genomic map position to the output file

if ($#ARGV == 1 && $ARGV[0] ne $ARGV[1]) {
	$fileIn = $ARGV[0];
	$file_out = $ARGV[1];
}


open(OUTPUT, ">$file_out");


open(FILE, "<$fileIn");


while (<FILE>) { 
	
	$Line= $_;
	chop $Line;
	@TABs = split(/\t/, $Line);
	$randomer = @TABs[0];
		
	if (@TABs[1] != 4){ 

		$strand = "F";
		if (@TABs[1] == 16){ 
			$strand = "R";
		}

		@chroms = split(/_/, @TABs[2]);
		$chrom  = @chroms[1];
		$num4 =  @TABs[3];
		$genomic4 = $chrom ."_".$strand."_". $num4;
		@genomics = ($genomic1,$genomic2,$genomic3,$genomic4,$genomic5,$genomic6,$genomic7);
	}
	else{
		$genomic4 = "unaligned";
	}
	print OUTPUT "$randomer\t$genomic4\n";
}
close FILE;
