# Supplementary material for: Genome-wide identification of hypoxia-induced enhancer regions
Source: PeerJ. 2015 Dec 21;3:e1527. doi: 10.7717/peerj.1527 (PMC4690393; doi:10.7717/peerj.1527)
Supplement: File S5 [file peerj-03-1527-s005.zip › enhancer_analysis_pipeline/creation_of_randomer_genomic_match_list/bowtie_to_match_list/randomer_genomic_bowtie2_alignment_repeat_non_repeat_separater.pl]

#this script takes in the bowtie2 alignment and outputs a list of repetitive alignments and unique alignments 
if ($#ARGV == 2) {
	$fileIn = $ARGV[0];
	$file_out_non_repeats = $ARGV[1];
	$file_out_repeats = $ARGV[2];
} 


open(OUTPUT_NON, ">$file_out_non_repeats");

open(OUTPUT_REP, ">$file_out_repeats");


open(FILE, "<$fileIn");


while (<FILE>) { 
	
	$Line= $_;
	chop $Line;
	@TABs_Line = split(/\t/, $Line);
	$randomer = substr(@TABs_Line[0],1,20);
	@alignment_type = split(/:/, @TABs_Line[12]);

		
	if (@alignment_type[0] eq "XS"){ 
		print OUTPUT_REP "$Line\n";	
	}
	else{
		print OUTPUT_NON "$Line\n";
	}
}

close FILE;
close OUTPUT_NON;
close OUTPUT_REP;
