# Supplementary material for: Genome-wide identification of hypoxia-induced enhancer regions
Source: PeerJ. 2015 Dec 21;3:e1527. doi: 10.7717/peerj.1527 (PMC4690393; doi:10.7717/peerj.1527)
Supplement: File S5 [file peerj-03-1527-s005.zip › enhancer_analysis_pipeline/creation_of_randomer_genomic_match_list/bowtie_to_match_list/rep_sorter.pl]

#this script takes in the output of repeat_region_number_limiter.pl and orders the repeat positions
if ($#ARGV == 1 && $ARGV[0] ne $ARGV[1]) {
	$fileIn = $ARGV[0];
	$file_out = $ARGV[1];
} 


open(OUTPUT, ">$file_out");


open(FILE, "<$fileIn");


while (<FILE>) { 
	
	$Line= $_;
	chop $Line;
	@TABs_Line = split(/\t/, $Line);
	$randomer = @TABs_Line[0];
	print OUTPUT "$randomer\t";
	$len = @TABs_Line;
	$chrom = @pos[0];
	$strand = @pos[1];
	$nuc = @pos[2];
	$j=1;
	while ($j<$len){
		$position = @TABs_Line[$j];
		$poshash{@TABs_Line[$j]} = @TABs_Line[$j];
		$j++;
		#$weight = $TABs[$j]/$total_reads;
		#print OUTPUT "$weight\t";
		#$j++;
		
	}
	for $key ( sort {$a<=>$b} keys %poshash) {
           		print OUTPUT "$poshash{$key}\t";
	}
	print OUTPUT "\n";
	undef %poshash;

}
close FILE;
close OUTPUT;
