# Supplementary material for: Genome-wide identification of hypoxia-induced enhancer regions
Source: PeerJ. 2015 Dec 21;3:e1527. doi: 10.7717/peerj.1527 (PMC4690393; doi:10.7717/peerj.1527)
Supplement: File S5 [file peerj-03-1527-s005.zip › enhancer_analysis_pipeline/creation_of_randomer_genomic_match_list/bowtie_to_match_list/repeat_loc_liner.pl]

#this script takes the output of lesser_alignments_filter.pl and groups each repeat set into a single line of genomic locations following the randomer
if ($#ARGV == 1) {
	$fileIn = $ARGV[0];
	$file_out_loc_shared = $ARGV[1];

}


open(OUTPUT, ">$file_out_loc_shared");


open(FILE, "<$fileIn");


while (<FILE>) { 
	
	$Line= $_;
	chop $Line;
	@TABs_Line = split(/\t/, $Line);
	$randomer = @TABs_Line[0];
	$flag = @TABs_Line[1];
	$strand = "F";
	if ($flag == 16 || $flag == 272){
		$strand = "R";
	} 
	@chroms = split(/_/, @TABs_Line[2]);
	$chrom  = @chroms[1];
	$nuc =  @TABs_Line[3];
	$pos = $chrom."_".$strand."_".$nuc;

	if ($flag < 256){ 

		print OUTPUT "\n$randomer\t$pos";	
	}
		
	if ($flag > 255){ 

		print OUTPUT "\t$pos";
	}
}

close FILE;
close OUTPUT;
