# Supplementary material for: Genome-wide identification of hypoxia-induced enhancer regions
Source: PeerJ. 2015 Dec 21;3:e1527. doi: 10.7717/peerj.1527 (PMC4690393; doi:10.7717/peerj.1527)
Supplement: File S5 [file peerj-03-1527-s005.zip › enhancer_analysis_pipeline/creation_of_randomer_genomic_match_list/bowtie_to_match_list/repeat_region_number_limiter.pl]

#this script takes repeat_loc_liner.pl output and filters out match reads mapping to more than $max_regions argument
if ($#ARGV == 1) {
	$fileIn = $ARGV[0];
	$max_regions = $ARGV[1];

} 


$max_regions = $max_regions + 2;


open(FILE, "<$fileIn")
	or die "Can't open input: $file $!";


while (<FILE>) { 
	
	$Line= $_;
	chop $Line;
	@TABs_Line = split(/\t/, $Line);
	$len = @TABs_Line;
	if ($max_regions > $len){
		print "$Line\n";
	}
}

close FILE;
