# Supplementary material for: Genome-wide identification of hypoxia-induced enhancer regions
Source: PeerJ journal article supplement (doi:10.7717/peerj.1527), 2015-12-21

A nucleic acid barcoding  
method to assay genome-  
wide enhancer activity

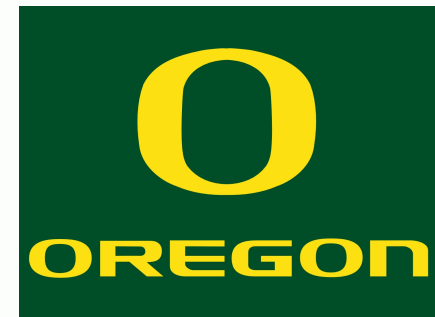

Nick Kamps-Hughes  
Eric Johnson Lab

# Enhancer Library Synthesis

A DNA space to be queried for enhancer activity, in this case the *Drosophila* genome, is randomly fragmented and ligated to divergent adapters to prepare test fragments for enhancer assay

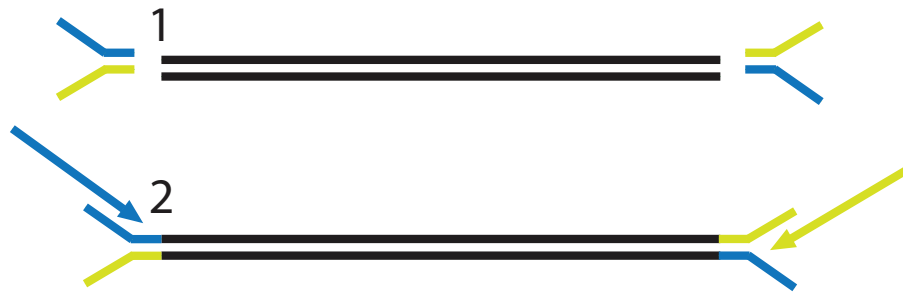

Illumina priming sequence, 20N randomer tag, and minimal promoter are added to the GFP ORF via successive PCR additions

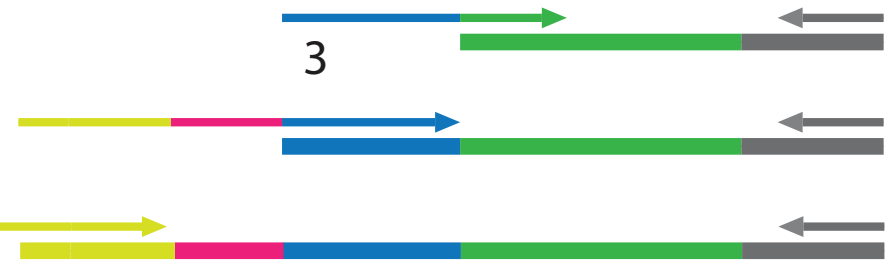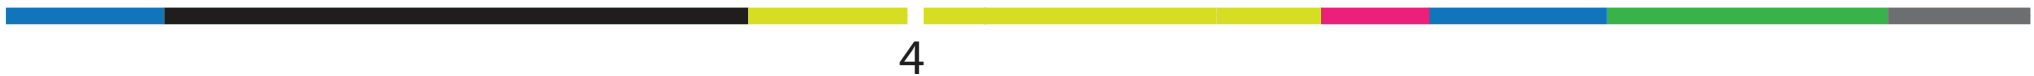

The two pools are ligated together generating a linear construct library containing complexity in both the enhancer and randomer tag positions

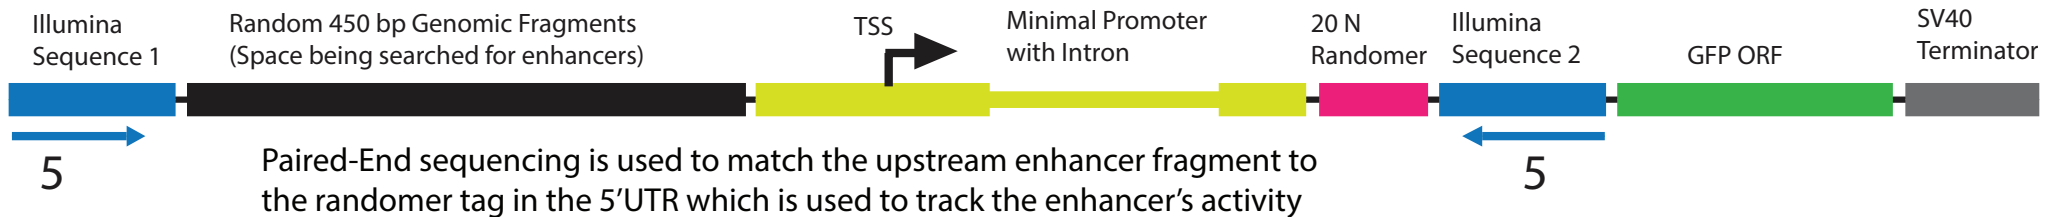

# *Enhancer Library Assay*

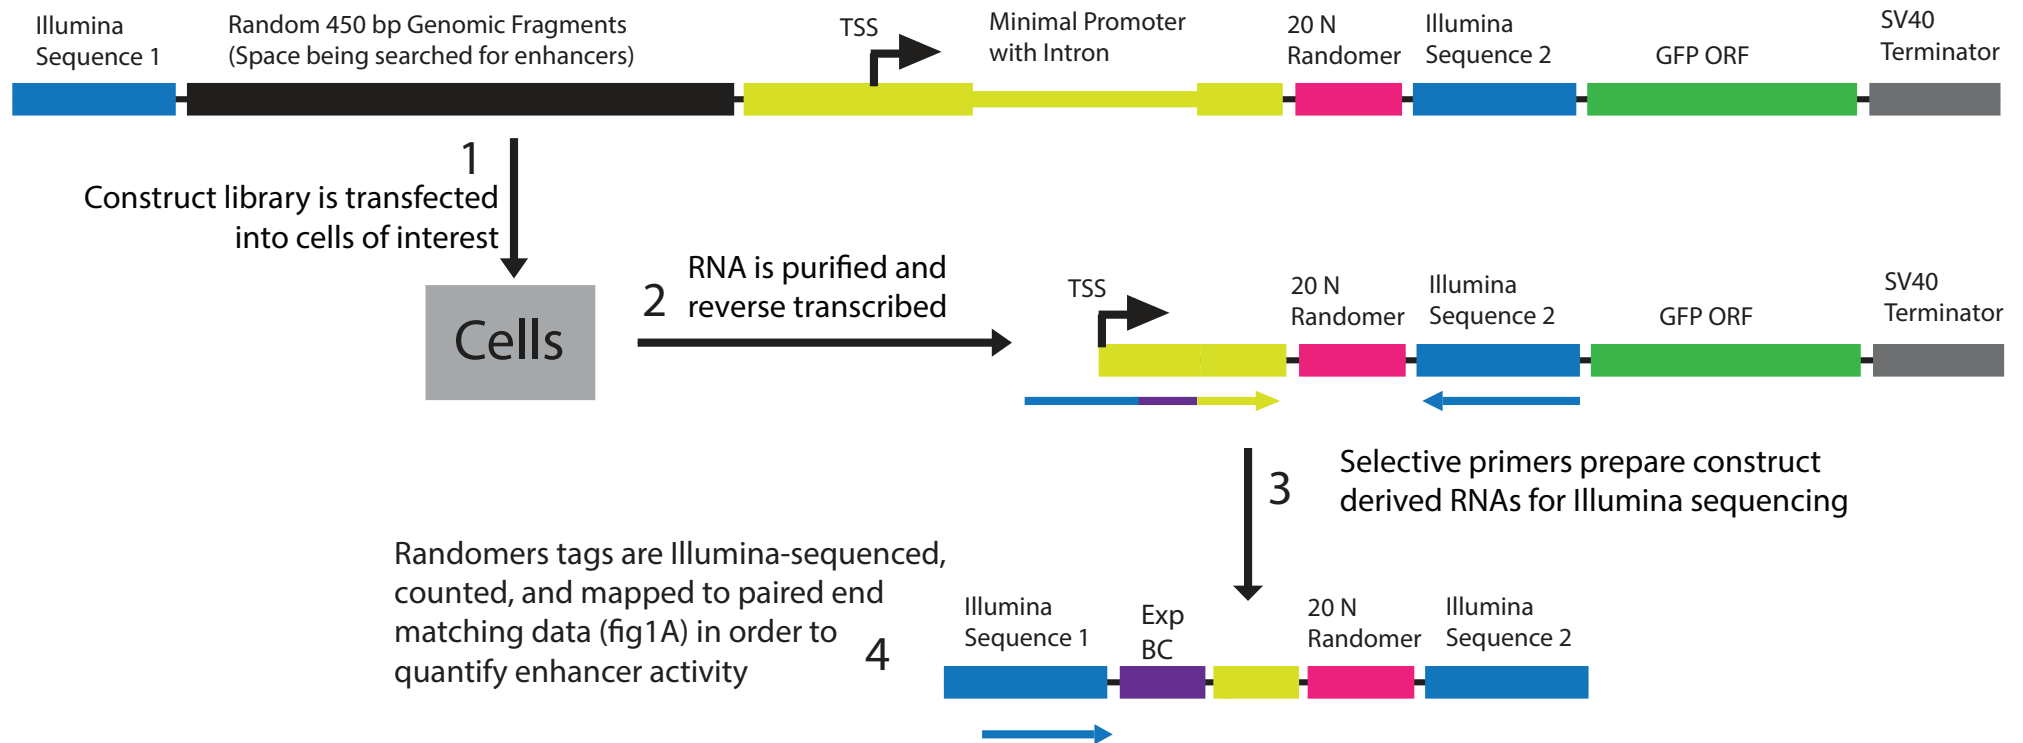

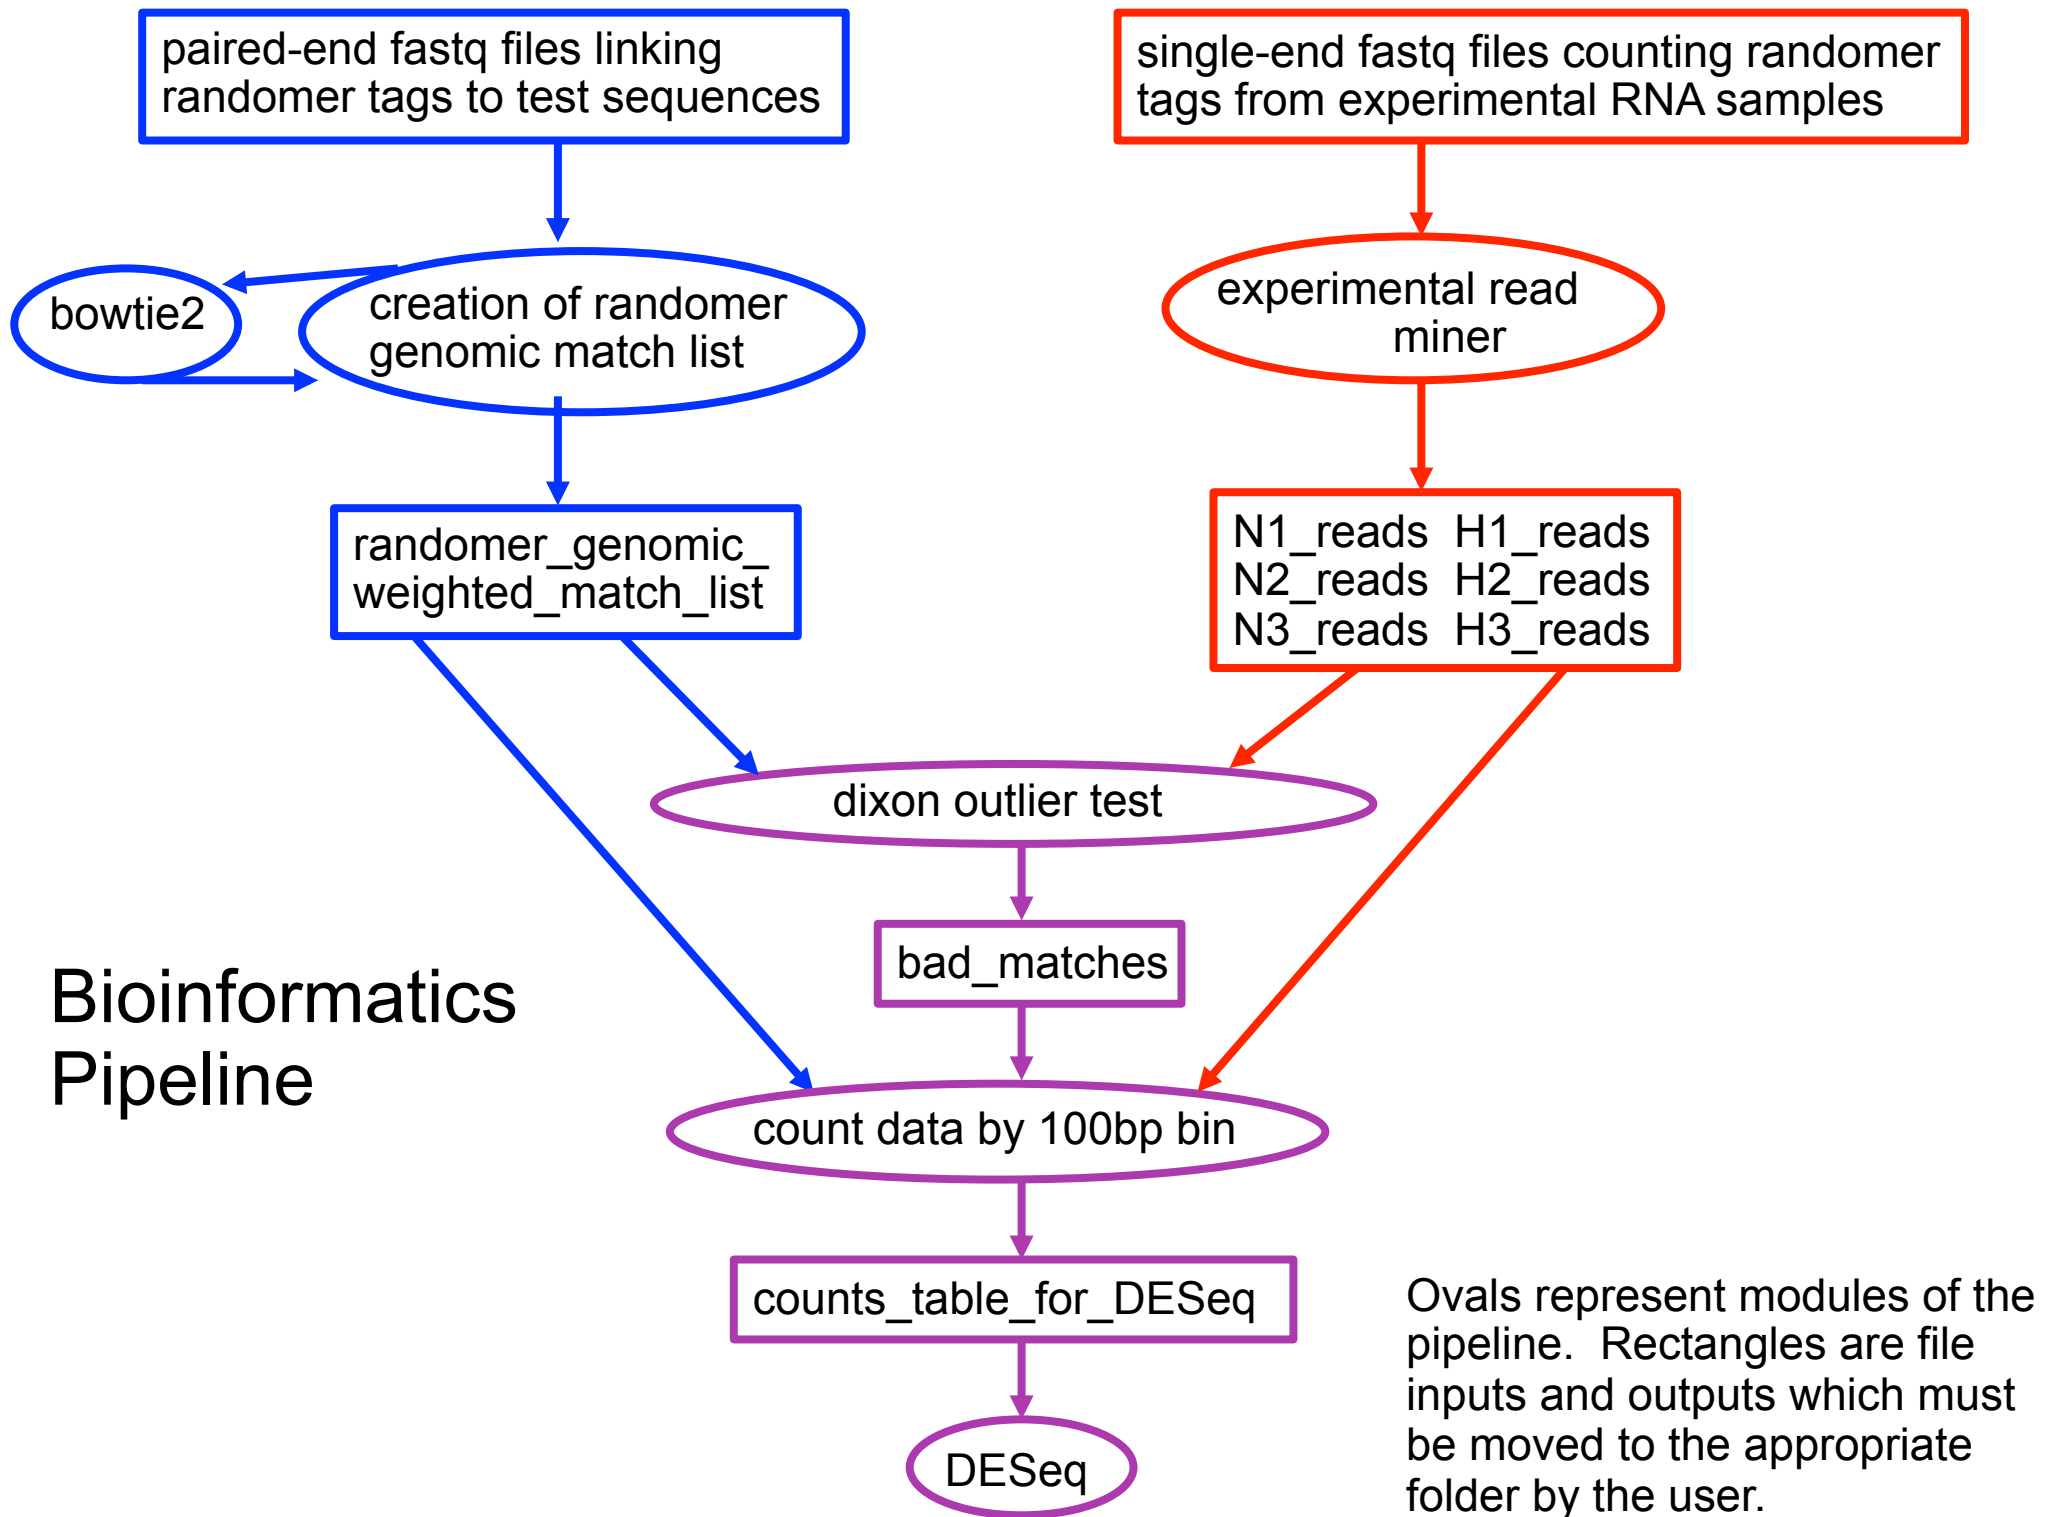

Supplement: Supplementary_File_S4.zip [file Supplementary_File_S4.zip]
